# Supplementary material
Source: PubMed Central journal article supplement (PMC6233739)
Supplement: jamadermatol-154-1221-s001.pdf [file jamadermatol-154-1221-s001.pdf]

1  
2 **Effect of neurokin-1 receptor (NK<sub>1</sub>R) antagonism on pruritus in patients with Sézary**  
3 **Syndrome**

4  
5 *A randomized, placebo-controlled, double-blinded study of aprepitant in the treatment of*  
6 *pruritus in patients with Sézary Syndrome*

7  
8  
9 **Study Chair:**

10  
11 *Nancy J. Brown, M.D.*  
12 *Chair and Physician-in-Chief*  
13 *Department of Medicine*  
14 *Hugh Jackson Morgan Professor Medicine and Pharmacology*  
15 *Vanderbilt University School of Medicine*

16  
17  
18 **Supported by:**

19  
20  
21  
22  
23  
24  
25  
26  
27  
28  
29  
30  
31  
32  
33  
34  
35  
36 *(Any modification to the protocol should be annotated on the coversheet or in an appendix. The*  
37 *annotation should note the exact words that are changed, the location in the protocol, the date*  
38 *the modification was approved by the Executive Committee, and the date it became effective.)*

39  
40 **Version 1**  
41 **April 1, 2011**

|    | <b>TABLE OF CONTENTS</b>                                            | <u>PAGE</u>                             |
|----|---------------------------------------------------------------------|-----------------------------------------|
| 42 |                                                                     |                                         |
| 43 |                                                                     |                                         |
| 44 | <b>CLINICAL SITES PARTICIPATING IN THE STUDY .....</b>              | <b>3</b>                                |
| 45 |                                                                     |                                         |
| 46 | <b>STUDY TEAM ROSTER .....</b>                                      | <b>4</b>                                |
| 47 |                                                                     |                                         |
| 48 | <b>1. INTERVENTIONS AND DURATION .....</b>                          | <b>6</b>                                |
| 49 |                                                                     |                                         |
| 50 | <b>2. SAMPLE SIZE AND POPULATION .....</b>                          | <b>6</b>                                |
| 51 |                                                                     |                                         |
| 52 | <b>3. STUDY OBJECTIVES .....</b>                                    | <b>7</b>                                |
| 53 |                                                                     |                                         |
| 54 | <b>4. BACKGROUND .....</b>                                          | <b>8</b>                                |
| 55 |                                                                     |                                         |
| 56 | <b>5. RATIONALE .....</b>                                           | <b>9</b>                                |
| 57 |                                                                     |                                         |
| 58 | <b>6. SUPPORTING DATA .....</b>                                     | <b>9</b>                                |
| 59 |                                                                     |                                         |
| 60 | <b>7. SELECTION AND ENROLLMENT OF SUBJECTS .....</b>                | <b>10</b>                               |
| 61 |                                                                     |                                         |
| 62 | <b>8. STUDY ENROLLMENT PROCEDURES .....</b>                         | <b>10</b>                               |
| 63 |                                                                     |                                         |
| 64 | <b>9. STUDY INTERVENTIONS .....</b>                                 | <b>11</b>                               |
| 65 |                                                                     |                                         |
| 66 | <b>10. CLINICAL AND LABORATORY EVALUATIONS .....</b>                | <b>11</b>                               |
| 67 |                                                                     |                                         |
| 68 | <b>11. MANAGEMENT OF ADVERSE EXPERIENCES.....</b>                   | <b>16</b>                               |
| 69 |                                                                     |                                         |
| 70 | <b>12. CRITERIA FOR INTERVENTION DISCONTINUATION .....</b>          | <b>16</b>                               |
| 71 |                                                                     |                                         |
| 72 | <b>13. STATISTICAL CONSIDERATIONS .....</b>                         | <b>16</b>                               |
| 73 |                                                                     |                                         |
| 74 | <b>14. DATA COLLECTION, SITE MONITORING, AND ADVERSE EXPERIENCE</b> |                                         |
| 75 | <b>REPORTING .....</b>                                              | <b>18</b>                               |
| 76 |                                                                     |                                         |
| 77 | <b>15. HUMAN SUBJECTS .....</b>                                     | <b>19</b>                               |
| 78 |                                                                     |                                         |
| 79 | <b>16. PUBLICATION OF RESEARCH FINDINGS .....</b>                   | <b>20</b>                               |
| 80 |                                                                     |                                         |
| 81 | <b>17. REFERENCES .....</b>                                         | <b>20</b>                               |
| 82 |                                                                     |                                         |
| 83 | <b>APPENDICES</b>                                                   |                                         |
| 84 | <b>I. Visual analogue scale</b>                                     | <b>III. Model informed consent form</b> |
| 85 | <b>II. Dermatology quality of life index</b>                        |                                         |

86  
87  
88  
89  
90  
91  
92  
93  
94  
95  
96  
97  
98

CLINICAL SITES PARTICIPATING IN THE STUDY

**Nancy J. Brown, M.D.**  
**Chair and Physician-in-Chief**  
**Department of Medicine**  
**Hugh Jackson Morgan Professor Medicine and Pharmacology**  
**Vanderbilt University School of Medicine**  
1161 21st Ave South  
D-3100 Medical Center North  
Nashville, Tennessee 37232-2358  
Phone: (615) 343-8701 Fax: (615) 343-2551  
[Nancy.j.brown@vanderbilt.edu](mailto:Nancy.j.brown@vanderbilt.edu)

## STUDY TEAM ROSTER

99  
100  
101  
102  
103  
104  
105  
106  
107  
108  
109  
110  
111  
112  
113  
114  
115  
116  
117  
118  
119  
120  
121  
122  
123  
124  
125  
126  
127  
128  
129  
130  
131  
132  
133  
134  
135  
136  
137  
138  
139  
140  
141  
142

**Brittany T. Straka, M.D.**  
**Research Fellow, Division of Clinical Pharmacology**  
**Department of Medicine**  
**Vanderbilt University School of Medicine**  
566 Robinson Research Building  
Nashville, TN 37235-6602  
Pager: (615) 835-5323 Fax: (615) 343-2474  
[Brittany.t.straka@vanderbilt.edu](mailto:Brittany.t.straka@vanderbilt.edu)

**John A. Zic, M.D.**  
**Associate Professor of Medicine/Dermatology**  
**Director, VU Cutaneous Lymphoma Clinic**  
**Vanderbilt University School of Medicine**  
Vanderbilt Dermatology, One Hundred Oaks  
719 Thompson Lane, Suite 26300  
Nashville, TN 37204-3609  
Phone: (615) 322-0845 Fax: (615) 343-2591  
[john.zic@vanderbilt.edu](mailto:john.zic@vanderbilt.edu)

**Laura McGirt, M.D.**  
**Assistant Professor of Medicine/Dermatology**  
**Vanderbilt University School of Medicine**  
Vanderbilt Dermatology, One Hundred Oaks  
719 Thompson Lane, Suite 26300  
Nashville, TN 37204-3609  
Phone: (615) 322-0845 Fax: (615) 343-2591  
[laura.y.mcgirt@vanderbilt.edu](mailto:laura.y.mcgirt@vanderbilt.edu)

**Brigitta Brannon**  
**Clinical Trials Specialist**  
Vanderbilt Dermatology, One Hundred Oaks  
719 Thompson Lane, Suite 26300  
Nashville, TN 37204-3609  
Phone: (615) 936-1133 Fax: (615) 343-3947  
[brigitta.brannon@vanderbilt.edu](mailto:brigitta.brannon@vanderbilt.edu)

143  
144  
  
145  
146  
147  
148  
  
149  
150  
151  
152  
  
153  
  
154  
  
155  
156  
157  
158  
159  
160  
161  
  
162  
163  
  
164  
165  
  
166  
  
167  
  
168  
  
169  
  
170  
  
171  
  
172  
  
173

## PRÉCIS

### Study Title

Effect of neurokinin-1 receptor (NK<sub>1</sub>R) antagonism on pruritus in patients with Sézary Syndrome.

### Objectives

The purpose of this study is to test the hypothesis that administration of aprepitant decreases the severity of pruritus in patients with Sézary Syndrome.

### Design and Outcomes

Single center, randomized, double-blinded, placebo-controlled, crossover study design.

The study will examine the effect of aprepitant on pruritus in patients with Sézary Syndrome. A baseline substance P level will be obtained in each subject from the serum. Substance P will also be measured through tissue obtained through stored skin biopsies. Subjects will be randomly allocated to one of two treatments, aprepitant or placebo. Subjects will remain on the first treatment for one week. They will then undergo a washout period of one week from the first drug, and will then crossover to the other drug for a one-week period.

Pruritus will be evaluated daily by means of a visual analogue scale (VAS), in which a score of 0 indicates no pruritus and a score of 10 indicates the worst pruritus imaginable.

Quality of life will be evaluated by means of the Dermatology Life Quality Index (DLQI) questionnaire (range, 0 to 30, higher scores indicate a worse outcome).

174

175 **1 Interventions and Duration**

176

177 Subjects will be randomly assigned to receive aprepitant or placebo using a permuted-  
178 block randomization algorithm.

179

180

181

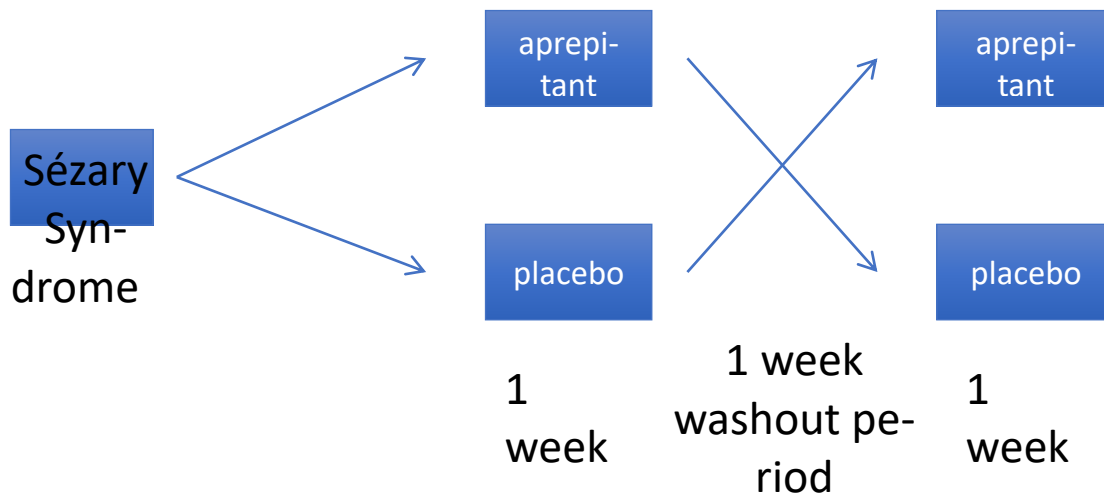

182

183

184 Subjects with Sézary Syndrome will be randomly allocated to receive placebo versus  
 185 aprepitant. Aprepitant will be administered orally in a dose of 125mg on day 1 and 80mg  
 186 daily on each subsequent day for a total of 7 days. After the 1week treatment period, all  
 187 subjects will undergo a 1week washout period from study drug. Subjects will then cross-  
 188 over and receive the opposite study drug, again for a 7 day period.

189

190 Subjects will undergo a baseline blood draw in order to quantify the amount of substance  
 191 P in the serum. All patients with Sézary Syndrome are expected to have had their skin bi-  
 192 opsied when originally diagnosed in the VUMC dermatology clinic, and substance P lev-  
 193 els will be obtained through tissue from these stored skin biopsies.

194

195 Subjects will complete a VAS on the first day of treatment and daily for the duration of  
 196 the study. The DLQI will be completed on the first and last day of treatment, in each  
 197 treatment arm.

198

199 **2 Sample Size and Population**

200 All subjects will be patients in the Vanderbilt University Medical Center (VUMC) der-  
 201 matology clinic with known Sézary Syndrome. The goal of this clinical trial is to deter-

202 mine if NK1R antagonism alters the severity of pruritus in Sézary Syndrome. Sample size  
203 calculations have been based on the decrease in severity of pruritus following aprepitant  
204 administration in an open-label, non-randomized study of 5 patients with cutaneous T-  
205 cell lymphoma (3 with Sézary Syndrome and 2 with mycosis fungoides) with a decrease  
206 in pruritus from 9.6 to 4.3 as measured on the visual analogue scale. In our study, a sam-  
207 ple size of 14 will have 83% power to detect a difference in means using a paired t-test  
208 with a 0.05 two-sided significance level. Assuming 10% dropout rate, we will enroll 16  
209 subjects.

### 210 3 **Study objectives**

#### 211 Primary Objective

212

213 To evaluate the effect of administration of aprepitant on pruritus in patients with Sézary  
214 Syndrome compared to administration of placebo.

215

216 The primary endpoint is the severity of pruritus as measured on the VAS.

217 We hypothesize that administration of aprepitant will decrease the severity of pruritus in  
218 patients with Sézary Syndrome compared to administration of placebo.

219

220 The secondary endpoint is the quality of life as measured on the DLQI. We hypothesize  
221 that administration of aprepitant will lower the score on the quality of life index com-  
222 pared to administration of placebo.

223

#### 224 Secondary Objective

225

226 We hypothesize that serum substance P concentrations correlate with substance P in the  
227 skin and that circulating substance P concentrations will be elevated compared to those  
228 measured in normal controls in our laboratory.

229

230

231

232

233

234

235

236

237

238

239

240

241

242

243

244

245

246



#### 247 **4** **Background**

248 Sézary Syndrome, the leukemic variant in the spectrum of cutaneous T-cell lymphomas (CTCL),  
249 is characterized by erythroderma, peripheral adenopathies and circulating atypical mononuclear  
250 cells with cerebriform nuclei (Sézary cells, SC).<sup>1</sup> Pruritus is a common complaint in those with  
251 Sézary Syndrome and is often severe enough to cause insomnia and depression, and may impair  
252 quality of life.<sup>2,3</sup> Conventional peripheral acting antipruritic agents, such as emollients, topical  
253 steroids, and oral antihistamines, are ineffective, and targets for antipruritic drugs are expanding  
254 to include centrally located receptors.<sup>2,4</sup>

255 Substance P (SP) is neuropeptide of the tachykinin family. Among the three known tachykinin  
256 receptors, neurokinin-1, -2, and -3 receptors, neurokinin-1 receptor (NK<sub>1</sub>R) has the highest affin-  
257 ity for SP and is broadly expressed in the peripheral and central nervous system.<sup>4</sup> SP is responsi-  
258 ble for nociceptive transmission from the peripheral to the central nervous system.<sup>5</sup> It is also  
259 known to induce the release of inflammatory mediators from mast cells and is a potent vasodila-  
260 tor.<sup>5</sup> It has been shown that intradermally applied SP induces scratching behavior in mice, indi-  
261 cating a role of SP in pruritus.<sup>4</sup>

262 Lack of CD26, also known as dipeptidyl peptidase IV (DPPIV) is a constant feature of circulat-  
263 ing SC, and levels of the CD4+ CD26- subpopulation correlate with the extent of peripheral  
264 blood involvement in Sézary Syndrome.<sup>1</sup> DPPIV is a cell-surface marker of T lymphocytes that  
265 plays a role in the activation and proliferation of lymphocytes.<sup>5</sup> DPPIV, along with angiotensin-  
266 converting enzyme (ACE), inactivates circulating SP.<sup>5,6</sup> DPPIV sequentially releases the two N-  
267 terminal dipeptides<sup>7</sup> of SP, leaving the resulting fragment active as a transmitter of sensory  
268 nerves, but lacking the capacity to stimulate histamine release from mast cells.<sup>5,8</sup> The breakdown  
269 of exogenous SP is decreased in DPPIV-deficient rats.<sup>5,6</sup> Patients with Sézary Syndrome may  
270 suffer from severe pruritus because they lack DPPIV and are unable to fully breakdown SP.

271  
272  
273  
274  
275  
276  
277  
278  
279  
280

Substance P is inactivated by ACE and DPPIV. During ACE inhibition or when there is lack of DPPIV, there is less breakdown of exogenous substance P leading to increased vascular permeability through the NK<sub>1</sub>R. Increased circulating substance P can lead to the increased release of inflammatory mediators from mast cells, resulting in increased pruritus.

## 281 5 Rationale

282  
283 Aprepitant is a selective high-affinity antagonist of human substance P/neurokinin 1  
284 (NK<sub>1</sub>) receptors which has been shown in animal models to inhibit emesis induced by  
285 cytotoxic chemotherapeutic agents via central actions. Animal and human Positron  
286 Emission Tomography (PET) studies with aprepitant have shown that it crosses the blood  
287 brain barrier and occupies brain NK<sub>1</sub> receptors.  
288

289 Given that patients with Sézary Syndrome lack DPPIV, an enzyme known to breakdown  
290 substance P, we hypothesize that decreased degradation of substance P can contribute to  
291 pruritus. With evidence that substance P can contribute to pruritus, it is important to es-  
292 tablish whether NK1 receptor antagonism is effective in treating the condition.  
293

294 The purpose of this randomized, double-blind, placebo-controlled study is to test the hy-  
295 pothesis that administration of aprepitant will decrease the severity of pruritus in patients  
296 with Sèzary Syndrome.  
297

## 298 6 Supporting Data

299  
300 Oral administration of aprepitant is FDA approved in the treatment of chemotherapy-  
301 induced nausea and vomiting and is administered in the dose of 125mg day 1 and 80mg  
302 day 2 and 3.<sup>9</sup> The most common adverse effects reported in phase 3 trials include fatigue,  
303 hiccups, and dyspepsia.<sup>9</sup>  
304

305 Aprepitant has been used in case reports and small studies in the treatment of pruritus.  
306 Aprepitant as an Antipruritic Agent?<sup>3</sup> was case report describing the effect of aprepitant  
307 on pruritus in 3 patients with Sézary Syndrome. An oral dose of 80mg daily for one week  
308 was administered and pruritus was evaluated by means of a visual-analogue scale, in  
309 which a score of 0 indicates no pruritus and a score of 10 indicates the worst pruritus im-  
310 aginable. Scores of 7, 8, and 9 dropped to 2, 3, and 2, respectively, after one day of  
311 treatment, and remained the same after one week. Evaluation of quality of life was with  
312 the Dermatology Life Quality Index (DLQI) questionnaire (range, 0 to 30; higher scores  
313 indicate worse outcomes), resulted in scores of 22 and 17, and dropped to 8 and 4, re-  
314 spectively, for 2 of the 3 patients, the third patient was not evaluated with this scale.  
315

316 Oral Aprepitant is Highly Efficient in the Therapy of Refractory Pruritus in  
317 Erythrodermic Cutaneous T-cell Lymphoma was a small prospective, **open label** study  
318 examining the effect of aprepitant in 5 patients with erythrodermic CTCL (3 with Sèzary  
319 syndrome and 2 with erythrodermic mycosis Fungoides). Severity of pruritus was  
320 assessed using a VAS, and quality of life was measured via the DLQI. A response was  
321 defined as a more than 50% reduction, no response less than 25% and a partial response  
322 between 25% and 50% reduction of the VAS compared to baseline. The overall response  
323 rate to the aprepitant therapy was 80% with 4/5 patients demonstrating a good response.  
324

325 **7**      **Selection and enrollment of subjects**

326      **Inclusion Criteria**

- 327      1. Known Sézary Syndrome – the leukemic variant in the spectrum of cutaneous T-cell  
328          lymphomas (CTCL) characterized by erythroderma, peripheral adenopathies and circu-  
329          lating atypical mononuclear cells with cerebriform nuclei (Sézary Cells).
- 330      2. Pruritus uncontrolled by conventional treatment. Baseline VAS must be > 4.
- 331      3. Age 18 through 80 years of age.

332      **Exclusion Criteria**

- 333      1. Known hepatic impairment (Defined as LFTs > 3 times the upper limit of normal).
- 334          a. LFTs will be obtained prior to drug administration.
- 335      2. Pregnancy (all women of child-bearing potential will undergo urine beta-hcg testing).
- 336      3. Aprepitant is contraindicated with concurrent use of cisapride or pimozide, and other  
337          potent inhibitors of CYP3A4.

338

339 **8**      **Study enrollment procedures**

340      All patients who present to the VUMC dermatology clinic, or established patients of the  
341      clinic, with biopsy proven Sézary Syndrome will be eligible. Informed consent will be  
342      obtained verbally and in writing. Subjects who meet the inclusion and exclusion criteria  
343      will be enrolled.

344      Subjects will be randomly assigned to treatment using a permuted-block randomization  
345      algorithm. Dr. Chang Yu, study biostatistician, will provide an allocation schedule, which  
346      will be uploaded on a password-protected web site that is accessible to the investigational  
347      pharmacist, but not the investigators. After subjects have been consented and screened for  
348      the inclusion and exclusion criteria, investigators will document these and for the eligible  
349      subjects, fax a copy of a prescription to the investigational pharmacy. The pharmacist  
350      will assign the subject a randomization number from the central allocation schedule and  
351      will provide the investigator with the drug. An extra label containing the randomization  
352      number will be put in the subject's records.

353      If a subject declines to continue the study at any time, the study will be stopped and all  
354      collected data will be withdrawn and destroyed.

355 **9**     Study interventions

356     ***Interventions, Administration, and Duration***

357     Following consent, each patient will undergo a baseline history and physical examination  
358     (targeted to skin). A prescription will be faxed to the investigational pharmacist. An in-  
359     travenous catheter will be placed in the patient's forearm for blood drawing. Blood will  
360     be drawn for quantification of substance P. The severity of pruritus will be quantified us-  
361     ing VAS (appendix). Study drug will be given orally in a dose of 125mg on day 1 and  
362     80mg daily on each subsequent day for a total of 7 days.

363     ***Handling of Study Interventions***

364     Study drug and matching placebo will be purchased by the investigational pharmacy (vs.  
365     will be provided by Merck & Co.) \*\*\*Need to hear back from Merck.\*\*\*

366     ***Concomitant Interventions***

367     Required Interventions: Subjects will be instructed to continue using any anti-pruritic  
368     treatments they used prior to the initiation of study.

369     Prohibited interventions: Aprepitant is contraindicated with concurrent use of cisapride  
370     and pimozide, and other inhibitors of CYP3A4.

371

372 **10**     Clinical and laboratory evaluations

373

374

375     See following page.

376

377

378

**Schedule of Evaluations**

| Evaluation                               | Screening | Pre-Entry<br>(0 day) | 1<br>day | 2<br>day | 3<br>day | 4<br>day | 5<br>day | 6<br>day | 7<br>day | Washout<br>1 week | 1<br>day | 2<br>day | 3<br>day | 4<br>day | 5<br>day | 6<br>day | 7<br>day |
|------------------------------------------|-----------|----------------------|----------|----------|----------|----------|----------|----------|----------|-------------------|----------|----------|----------|----------|----------|----------|----------|
| Informed Consent                         | X         |                      |          |          |          |          |          |          |          |                   |          |          |          |          |          |          |          |
| Documentation of Sèzary Syndrome         | X         |                      |          |          |          |          |          |          |          |                   |          |          |          |          |          |          |          |
| Medical/Treatment History                |           | X                    |          |          |          |          |          |          |          |                   |          |          |          |          |          |          |          |
| Clinical Assessment                      |           | X                    |          |          |          |          |          |          | X        |                   | X        |          |          |          |          |          | X        |
| <i>Targeted</i> Physical Exam            |           | X                    |          |          |          |          |          |          | X        |                   | X        |          |          |          |          |          | X        |
| Pregnancy Testing                        |           | X                    |          |          |          |          |          |          |          |                   | X        |          |          |          |          |          |          |
| Complete metabolic panel                 |           | X                    |          |          |          |          |          |          |          |                   |          |          |          |          |          |          |          |
| CBC                                      |           | X                    |          |          |          |          |          |          |          |                   |          |          |          |          |          |          |          |
| Urinalysis                               |           | X                    |          |          |          |          |          |          |          |                   |          |          |          |          |          |          |          |
| Serum substance P                        |           | X                    |          |          |          |          |          |          |          |                   |          |          |          |          |          |          |          |
| Visual analogue scale (VAS)              |           | X                    | X        | X        | X        | X        | X        | X        | X        |                   | X        | X        | X        | X        | X        | X        | X        |
| Dermatology quality of life index (DLQI) |           |                      | X        |          |          |          |          |          | X        |                   | X        |          |          |          |          |          | X        |

379

380

## ***Timing of Evaluations***

381

### **i.** Pre-Randomization Evaluations

382

383

These evaluations occur prior to the subject receiving any study interventions.

384

385

#### Screening

386

Subjects will be known patients of the VUMC dermatology clinic with known Sèzary Syndrome. After the informed consent document has been signed, documentation of their disease will be obtained.

387

388

389

390

#### Pre-Entry

391

Subjects who have successfully been screened for eligibility and have provided informed consent will return for baseline physical exam and screening labs. A medical/treatment history will be obtained. A clinical assessment with targeted skin exam will be performed. Screening labs include beta-hcg for women of child –bearing potential, complete metabolic panel, complete blood count, urinalysis, and serum substance P. A baseline VAS will be completed.

392

393

394

395

396

397

398

399

#### Entry

400

Only subjects whose labs fall within normal limits, and whose pruritus score as measured on the VAS is greater than or equal to 4 will enter the study.

401

Subjects will be randomized to aprepitant or placebo. Subjects will be required to meet at the VUMC dermatology clinic on day 1 of the study.

402

403

404

They will be provided with a supply of study drug, visual-analogue scales, and quality of life index scales to last them 7 days. They will return to clinic after 7 days of treatment.

405

406

407

### **ii.** On-Study Evaluations

408

409

Subjects will be instructed to take the study drug each morning, days 1-7 while on the first drug treatment, and again days 1-7 for the second drug treatment. They will also be instructed to fill out a VAS each evening. They will return to the VUMC dermatology clinic on day 7 for a clinical assessment and physical exam targeted to skin. They will undergo a washout period from study drug and will then return again to the VUMC dermatology clinic. After the washout period, the subjects will crossover to receive the opposite drug treatment to which they were randomized. They will undergo a clinical assessment, targeted physical exam and pregnancy testing on day 1. They will be instructed to take study drug and complete the VAS and DLQI as specified in the first arm of the study. They will return to clinic on the final day for a clinical assessment and targeted physical exam.

410

411

412

413

414

415

416

417

418

419

420

421

422 **iii.** Intervention Discontinuation Evaluations  
423 Each subject will undergo a clinical assessment and targeted physical exam at the  
424 end of the study.

425 **iv.** Post-Intervention Evaluations  
426 Subjects will be instructed to call the VUMC dermatology clinic if symptoms of  
427 pruritus worsen post-study. They will not be followed for any specific outcomes  
428 after the second drug period.

429 **v.** Final Evaluations  
430  
431 Each subject will undergo a clinical assessment and targeted physical exam at the  
432 end of the study.

433 **vi.** Pregnancy  
434 Female subjects will be instructed to avoid pregnancy while on-study. A pregnan-  
435 cy test will be completed upon entry into both study drug arms. If a subject be-  
436 comes pregnant she will be removed from the study.

### 437 ***Special Instructions and Definitions of Evaluations***

438  
439 **vii.** Informed Consent  
440  
441 Informed consent will be obtained verbally and in writing. Documentation of con-  
442 sent will be kept in the subject's chart. A copy of the consent will be provided to  
443 the subject.

444 **viii.** Documentation of Sèzary Syndrome  
445 Sèzary Syndrome is the leukemic variant in the spectrum of cutaneous T-cell  
446 lymphomas (CTCL) characterized by erythroderma, peripheral adenopathies ad  
447 circulating atypical mononuclear cells with cerebriform nuclei (Sèzary Cells).  
448 Subjects will be known to the VUMC dermatology clinic and will have a docu-  
449 mented diagnosis of their disease in the medical chart.

450 **ix.** Medical History  
451 The subject's full medical history will be reviewed.

452 **x.** Treatment History  
453 The subject's treatment history, specific to the treatment of Sèzary Syndrome,  
454 will be reviewed and documented.

455

456 ***xi.*** Clinical Assessment

457 The clinical assessment will focus on Sèzary Syndrome and the effect it has on  
458 the subject's level of functioning.

459 ***xii.*** Targeted physical exam

460 A physical exam targeted to a full body skin examination will be completed.

461 ***xiii.*** Laboratory Evaluations

462

463 Laboratory evaluations will include a complete metabolic panel (CMP), complete  
464 blood count (CBC), urinalysis, beta-hcg for women of child-bearing potential, and  
465 a serum substance P level.

466 ***xiv.*** Questionnaires

467 Pruritus will be evaluated daily by means of a VAS, in which a score of 0 indi-  
468 cates no pruritus and a score of 10 indicates the worst pruritus imaginable.

469 Quality of life will be evaluated by means of the DLQI (range, 0 to 30, higher  
470 scores indicate a worse outcome).

471

472

### ***Off-Intervention Requirements***

473

474 There are no requirements for follow-up on subjects once they have stopped using the  
475 study intervention.

476

477

478

479

480

481

482

483

484

485

486

487

488

489

490



491  
492  
493  
494  
495  
496  
497  
498  
499  
500

## **11 Management of adverse experiences**

An adverse event will be classified as serious if it a) results in death, b) is life-threatening, c) requires inpatient hospitalization, or prolongation of existing hospitalization, d) results in persistent or significant disability or incapacity, e) is a congenital anomaly or birth defect. Serious adverse events will be reported to the Data and Safety Monitoring Committee the IRB, NIH, and the FDA within 24 hours.

501  
502  
503  
504  
505

## **12 Criteria for intervention discontinuation**

Subjects will be instructed to contact a physician associated with the study if they no longer want to continue as an enrolled subject in the study. The subject will be withdrawn from the study and all data will be destroyed.

506

507

## **13 Statistical considerations**

508

### ***General Design Issues***

509

510

511

512

513

514

515

The primary objective is to evaluate the effect of aprepitant on pruritus in patients with Sézary Syndrome compared to administration of placebo. The study is designed as a cross-over between aprepitant and placebo. It is important that each subject receive both study treatments, as pruritus is a subjective sensation, which may be partially relieved by placebo.

516

517

518

519

520

521

The primary endpoint is a 50% reduction in pruritus as measured by the VAS. The secondary endpoint is a reduction in the DLQI score. There is no pre-defined expected reduction in the DLQI. Subjects will need to complete a VAS daily. To ensure compliance, subjects will be instructed to complete the VAS at the same time each day and will receive a phone call mid-week to ensure they are on track with the study.

522

523

524

525

526

527

528

The half-life of aprepitant is 9-14 hours. Using 14 hours and approximating 5 half-lives as the time needed to reach steady state, it will take 3 days to reach steady state. An intervention time of one-week will be sufficient to reach steady state and experience maximal effects of the drug. It will again take 3 days for drug washout, making a one-week washout period from study drug appropriate.

529

## 530 **Outcomes**

### 531 Primary Objective

532

533 To evaluate the effect of administration of Aprepitant on pruritus in patients with Sézary  
534 Syndrome compared to administration of placebo.

535

536 The primary endpoint is the severity of pruritus as measured on the VAS.

537 We hypothesize that administration of Aprepitant will decrease the severity of pruritus in  
538 patients with Sézary Syndrome compared to administration of placebo.

539

540 The secondary endpoint is the quality of life as measured on the DLQI. We hypothesize  
541 that administration of Aprepitant will lower the score on the quality of life index com-  
542 pared to administration of placebo.

543

### 544 Secondary Objective

545

546 We hypothesize that serum substance P concentrations correlate with substance P in the  
547 skin and that circulating substance P concentrations will be elevated compared to those  
548 measured in normal controls in our laboratory.

549

## 550 **Sample Size and Accrual**

551

552 Sample size calculations were based on a paired t-test to detect a difference on the primary  
553 endpoint VAS between the placebo and Aprepitant treatments. In a study conducted by  
554 Booken et al,<sup>2</sup> they reported a baseline VAS of  $9.6 \pm 0.9$  (mean  $\pm$  SD, n=5) and  $4.3 \pm 3.4$   
555 after at least 6 weeks of treatment. Based on these data and conservative assumptions of a  
556 correlation of 0.5 between two repeated measures on the same subjects and a 20% placebo  
557 effect, and assuming a treatment effect of 50% reduction (from 9.6 to 4.8), a sample size of  
558 14 (16 need to be enrolled, assuming a 10% dropout rate) will have 83% power to detect a  
559 mean difference of 2.9 (a mean of 7.7 on placebo versus a mean of 4.8 on Aprepitant), us-  
560 ing an SD of 3.4 for the within subject difference.

561

## 562 **Data Analyses**

563

564 Standard graphing and screening techniques will be used to detect outliers and to ensure  
565 data accuracy. Summary statistics for both continuous and categorical variables will be  
566 provided by randomization groups to describe the study sample.

567

This study is a 2X2 crossover (Aprepitant and placebo) study with repeated daily measure-

568 ments of visual analog scale for itching and additional secondary endpoints listed above  
569 during each study period. Treatment difference (i.e., aprepitant vs placebo) for each end-  
570 point will be estimated as within-subject mean difference along with their 95% confidence  
571 intervals. A paired t-test will be performed to compare the responses. If normality of the  
572 data is violated, signed rank test will be used. Even though we will make every effort to  
573 minimize a carry-over effect or period effect, we will nevertheless test for these effects us-  
574 ing the baseline measures taken right before each study period. This evaluation will be  
575 conducted using mixed-effect models and/or direct comparisons.

576 Mixed-effect models will also be used to analyze the data with a random subject effect and  
577 with treatment (aprepitant versus placebo) and time trend as fixed effects. We might also  
578 include baseline covariates which are potential confounders in the mixed-effect models to  
579 adjust for their effects. We will explore different plausible covariance matrices, such as  
580 compound symmetry and a first-order autoregressive process [AR(1)], in the mixed-effect  
581 models. We will check the model fitting by superimposing the fitted mean response pro-  
582 files on a time plot of the average observed response and to superimpose the fitted vario-  
583 gram on a plot of the empirical variogram (Diggle et al. 2002). The mixed-effect model  
584 analysis for other continuous endpoints will be conducted similarly.

585 Based on our past experience, we anticipate a drop-out rate of 10% or less. Subjects who  
586 drop out prior to completing study period 2 will be replaced. We will also keep the period  
587 one data collected on the replaced subject. If data are missing for an isolated time point  
588 during one of the study periods, mixed-effect models are robust in the sense that they can  
589 include subjects with missing data at some time points but not all time points to estimate  
590 the effects of interest. However, we will conservatively impute missing data to perform  
591 analyses with and without missing data to corroborate our findings.

592 Specific inferences on effects of interest will be made by reporting a point estimate along  
593 with a 95% confidence interval and the p value. Hypotheses will be tested at the level of  
594  $\alpha=0.05$ . This data analysis plan will be carried out using statistical software SPSS for Win-  
595 dows (Version 16.0, SPSS, Chicago, IL) or SAS<sup>®</sup> release 9.1.3 (Cary, NC) or statistical  
596 analysis package R (R Development Core Team, 2007).

597

## 598 **14 Data collection, site monitoring, and adverse experience reporting**

599

### 600 **Data and Safety Monitoring Plan**

601

602 The protocols and any amendments will be reviewed and approved by the Vanderbilt In-  
603 stitutional Review Board before any subject is enrolled. The PI will closely oversee the  
604 protocol in conjunction with the research fellow and dedicated research nurses. Any ad-  
605 verse events or toxicities will be reported to the IRB as per IRB guidelines. Any unto-  
606 ward medical event will be classified as an adverse event, regardless of its causal rela-  
607 tionship with the study. An adverse event will be classified as serious if it a) results in  
608 death, b) is life-threatening, c) requires inpatient hospitalization, or prolongation of exist-

609 ing hospitalization, d) results in persistent or significant disability or incapacity, e) is a  
610 congenital anomaly or birth defect. Serious adverse events will be reported to the IRB  
611 within 24 hours. The protocol for reporting SAEs will be standardized and reviewed at  
612 the October 2011 investigator meeting. Non-serious, unexpected adverse events will be  
613 reported within 5 working days to the DSMC and IRB.  
614

615 **15 Human subjects**

616

617 ***Institutional Review Board (IRB) Review and Informed Consent***

618

619 This protocol and the informed consent document (Appendix) and any subsequent  
620 modifications will be reviewed and approved by the IRB or ethics committee responsible  
621 for oversight of the study. A signed consent form will be obtained from the subject. For  
622 subjects who cannot consent for themselves, such as those below the legal age, a parent,  
623 legal guardian, or person with power of attorney, must sign the consent form; additional-  
624 ly, the subject's assent must also be obtained if he or she is able to understand the nature,  
625 significance, and risks associated with the study. The consent form will describe the pur-  
626 pose of the study, the procedures to be followed, and the risks and benefits of participa-  
627 tion. A copy of the consent form will be given to the subject, parent, or legal guardian,  
628 and this fact will be documented in the subject's record.

629 ***Subject Confidentiality***

630 We will use an electronic data collection form, designed to allow direct data entry and to  
631 minimize missing and erroneous values (using the REDCap system developed in the  
632 Vanderbilt Institute for Clinical and Translational Research or VICTR). The form for the  
633 initial trial has been tested at Vanderbilt. Data will be input into a protected web-based  
634 case report form (which can be readily downloaded into an SPSS or other database  
635 spreadsheet). Expected ranges are pre-specified to prevent errors such as the shifting of  
636 decimal points. The program includes a computerized audit trail so that the identity of in-  
637 dividuals entering or changing data can be tracked. In the case that changes are made,  
638 both original and revised data are saved. Data are backed up daily. The research nurse  
639 will enter clinical data. Brown laboratory personnel will enter research laboratory data. A  
640 unique identification case number is used to protect the confidentiality of the study par-  
641 ticipants. All research samples are bar coded with the subject's unique identifier. Data  
642 sets used for analysis also only contain this identifier. The key to the code is protected.  
643 Only the site investigator and research nurse will have access to information that identi-  
644 fies subjects participating in the study. The results of the tests run on research samples  
645 will not be recorded in any subject's medical record and neither the subject nor his or her  
646 doctor will be told of the results. Access to the Vanderbilt computer network is protected  
647 at the level of firewalls, TCP wrappers and university assigned user IDs. Data are secured  
648 with encryption algorithms and the network is maintained by the Medical Center's

649 Network Computer Service. All data will be accessible only to members of the research  
650 team.

651  
652 Seven years after completion of the study, all data will be destroyed.

### 653 ***Follow-up and Record Retention***

654  
655 Records will be maintained for 7 years following the end of the study, after which time  
656 they will be destroyed.

### 657 **16 Publication of research findings**

658  
659 Publication of the results of this trial will be governed by the policies and procedures de-  
660 veloped by the Executive Committee. Any presentation, abstract, or manuscript will be  
661 made available for review by the sponsor and the NINDS prior to submission.

### 662 **17 References**

- 663  
664 1. Bernengo MG, Novelli M, Quaglino P, et al. The relevance of the CD4+ CD26- subset in the  
665 identification of circulating Sézary cells. *Br. J. Dermatol.* 2001;144(1):125-135.  
666  
667 2. Booken N, Heck M, Nicolay JP, et al. Oral aprepitant in the therapy of refractory pruritus in  
668 erythrodermic cutaneous T-cell lymphoma. *Br J Dermatol.* 2010. Available at:  
669 <http://www.ncbi.nlm.nih.gov/pubmed/21039410>.  
670  
671 3. Duval A, Dubertret L. Aprepitant as an antipruritic agent? *N. Engl. J. Med.*  
672 2009;361(14):1415-1416.  
673  
674 4. Cevikbas F, Steinhoff M, Ikoma A. Role of Spinal Neurotransmitter Receptors in Itch: New  
675 Insights into Therapies and Drug Development. *CNS Neurosci Ther.* 2010. Available at:  
676 <http://www.ncbi.nlm.nih.gov/pubmed/20950328>.  
677  
678 5. Lambeir A, Durinx C, Scharpé S, De Meester I. Dipeptidyl-peptidase IV from bench to bed-  
679 side: an update on structural properties, functions, and clinical aspects of the enzyme DPP IV.  
680 *Crit Rev Clin Lab Sci.* 2003;40(3):209-294.  
681  
682 6. Ahmad S, Wang L, Ward PE. Dipeptidyl(amino)peptidase IV and aminopeptidase M metabo-  
683 lize circulating substance P in vivo. *J. Pharmacol. Exp. Ther.* 1992;260(3):1257-1261.  
684  
685 7. Heymann E, Mentlein R. Liver dipeptidyl aminopeptidase IV hydrolyzes substance P. *FEBS*  
686 *Lett.* 1978;91(2):360-364.  
687  
688 8. Mussap CJ, Geraghty DP, Burcher E. Tachykinin receptors: a radioligand binding perspective.  
689 *J. Neurochem.* 1993;60(6):1987-2009.  
690

691 9. Hesketh PJ. Chemotherapy-induced nausea and vomiting. *N. Engl. J. Med.*  
692 2008;358(23):2482-2494.  
693
